# Supplementary material for: Preemptive TPMT Genotyping and Adherence to Genotype-Based Therapeutic Recommendations Reduces the Healthcare Cost in Patients Receiving Azathioprine or 6-Mercaptopurine for Autoimmune Diseases
Source: MDPI journal article supplement (doi:10.3390/jpm13081208), 2023-07-29
Supplement: s1 [file s1]

# Supplementary Material: Preemptive *TPMT* Genotyping and Adherence to Genotype-Based Therapeutic Recommendations Reduces the Healthcare Cost in Patients Receiving Azathioprine or 6-Mercaptopurine for Autoimmune Diseases

Sarahí Valdez-Acosta <sup>1,†</sup>, Pablo Zubiaur <sup>2,\*,†</sup>, Miguel Angel Casado <sup>3</sup>, Jesús Novalbos <sup>2</sup>, Ana Casajús <sup>2</sup>, Diana Campodónico <sup>2</sup>, Itziar Oyagüez <sup>3</sup> and Francisco Abad-Santos <sup>2,4,\*</sup>

<sup>1</sup> Ethics Committee for Investigation with Medicinal Products (CEIm), Fundación de Investigación Biomédica (FIBH12O), Instituto de Investigación Sanitaria Hospital 12 de Octubre (imas12), Madrid, Spain, 28041; sarahivaldez.imas12@h12o.es

<sup>2</sup> Clinical Pharmacology Department, Hospital Universitario de La Princesa, Pharmacology Department of Faculty of Medicine, Universidad Autónoma de Madrid (UAM), Instituto de Investigación Sanitaria La Princesa (IP), Madrid, Spain, 28006; [jesus.novalbos.externo@salud.madrid.org](mailto:jesus.novalbos.externo@salud.madrid.org) (J.N.); [ana.casajus@salud.madrid.org](mailto:ana.casajus@salud.madrid.org) (A.C.); [diana.campodonico@salud.madrid.org](mailto:diana.campodonico@salud.madrid.org) (D.C.)

<sup>3</sup> Pharmacoeconomics & Outcomes Research Iberia S.L. (PORIB), Pozuelo de Alarcón, Madrid, Spain, 28224; [ma\\_casado@porib.com](mailto:ma_casado@porib.com) (M.A.C.); [ioyaguez@porib.com](mailto:ioyaguez@porib.com) (I.O.)

<sup>4</sup> Centro de Investigación Biomédica en Red de Enfermedades Hepáticas y Digestivas (CIBERehd), Instituto de Salud Carlos III, Madrid, Spain 28006

Supplementary Table S1. Individual cost per item, including lab tests and procedures, image studies, surgical procedures, consultations, and admissions per Hospital Department.

| Item                                         | Cost (€) |
|----------------------------------------------|----------|
| Blood count                                  | 4.29     |
| Biochemistry                                 | 31.63    |
| Coagulation study                            | 10.47    |
| Urine analysis                               | 8.44     |
| Arterial blood gas analysis                  | 4.25     |
| Venous blood gas analysis                    | 4.25     |
| <b>Autoimmunity study</b>                    |          |
| Proteinogram                                 | 9.04     |
| Antinuclear antibodies (ANA)                 | 29.52    |
| Antineutrophil cytoplasmic antibodies (ANCA) | 25.97    |
| Anti-desmoglein antibodies                   | 44.08    |
| Complement C3-C4 proteins                    | 12.23    |
| NMO antibodies                               | 137.55   |
| Lupus anticoagulant                          | 25.63    |
| Anti-acetylcholine receptor antibodies       | 82.34    |
| Triple tissue antibodies                     | 20.84    |
| BP 180 antibodies                            | 58.36    |
| BP 230 antibodies                            | 58.36    |
| Haptoglobin                                  | 10.38    |
| Coombs test (direct)                         | 10.49    |
| Coombs test (indirect)                       | 30.08    |
| Coombs test                                  | 29.46    |
| Total IgE                                    | 12.94    |
| Anti-peroxidase Ac                           | 10.42    |
| Anti-ENA antibodies                          | 31.66    |
| Anti-transglutaminase antibodies             | 49.05    |
| Cryoglobulins                                | 19.21    |
| Cryoagglutinins                              | 21.55    |
| Immunoglobulins                              | 7.46     |
| Anti DNA test                                | 29.81    |
| <b>Vitamins</b>                              |          |
| Folic acid                                   | 16.63    |
| Vitamin B12                                  | 18.37    |
| Vitamin D                                    | 27.30    |
| <b>Hormones</b>                              |          |
| TSH                                          | 17.55    |
| T3                                           | 11.21    |

|                                             |         |
|---------------------------------------------|---------|
| T4                                          | 16.30   |
| Intact PTH                                  | 37.59   |
| ACTH                                        | 21.21   |
| Thyroglobulin                               | 24.94   |
| Cortisol                                    | 16.37   |
| Glycated hemoglobin                         | 14.56   |
| <b>Genetic study</b>                        |         |
| <i>TPMT</i>                                 | 41.68   |
| <i>HLA-B*27</i>                             | 36.36   |
| <b>Virus</b>                                |         |
| Simple VH                                   | 24.00   |
| Varicella zoster virus                      | 34.47   |
| Toxoplasma                                  | 31.06   |
| Epstein-Barr virus test                     | 20.32   |
| Cytomegalovirus                             | 21.07   |
| HBV                                         | 50.80   |
| HCV                                         | 36.27   |
| HIV                                         | 161.54  |
| Rubella                                     | 17.87   |
| Influenza                                   | 55.88   |
| <b>Histological study</b>                   |         |
| Liver biopsy                                | 395.20  |
| Conjunctival biopsy                         | 1304.69 |
| Renal biopsy                                | 239.73  |
| Abdominal fat FNA                           | 241.97  |
| Colon biopsy                                | 144.67  |
| Skin biopsy FNA                             | 62.36   |
| Bone marrow biopsy with cytogenetic study   | 109.88  |
| Gastric biopsy                              | 388.17  |
| <b>Cultures and microbiological studies</b> |         |
| Antigens in urine                           | 30.60   |
| Urine biochemistry                          | 12.46   |
| Blood culture                               | 21.39   |
| Urine culture                               | 10.01   |
| Sputum culture                              | 23.17   |
| Stool culture                               | 13.63   |
| Stool parasites                             | 15.19   |
| Fecal occult blood                          | 4.47    |
| Catheter tip culture                        | 9.65    |
| Culture of superficial wound                | 20.62   |
| Pharyngeal exudate and culture              | 14.62   |

|                                  |        |
|----------------------------------|--------|
| Vaginal exudate and culture      | 14.94  |
| Conjunctival exudate             | 20.00  |
| CSF culture                      | 20.79  |
| Mantoux test                     | 36.76  |
| Clostridium difficile Toxin      | 25.88  |
| Galactomannan Aspergillus        | 20.00  |
| <b>Tumor markers</b>             |        |
| Alpha fetoprotein                | 12.59  |
| Beta 2 microglobulin             | 15.00  |
| carcinoembryonic antigen         | 12.17  |
| Ca 199 antigen                   | 16.37  |
| Prostate specific antigen (PSA)  | 21.14  |
| CA -125                          | 12.14  |
| CA-153                           | 14.25  |
| <b>Other</b>                     |        |
| Peripheral blood immunophenotype | 26.34  |
| Peripheral blood smear           | 5.35   |
| Immunofixation in serum          | 43.83  |
| ProBNP                           | 40.67  |
| CK.CK(MB)                        | 13.05  |
| Electrocardiograms               | 24.84  |
| Electroencephalogram             | 102.49 |
| Electromyogram                   | 123.28 |
| Plethysmography                  | 80.21  |
| Spirometry                       | 44.33  |
| Nitric oxide determination       | 17.71  |
| <b>Imaging studies</b>           |        |
| <b>X-rays</b>                    |        |
| Chest X-ray                      | 19.39  |
| Abdominal X-ray                  | 24.24  |
| Cervical X-ray                   | 21.16  |
| Dorsal X-ray                     | 23.46  |
| Lumbar Spine X-Ray               | 20.05  |
| Bone Region X-Ray                | 13.43  |
| Hip X-Ray                        | 20.81  |
| Knee X-Ray                       | 24.76  |
| Elbow X-Ray                      | 19.06  |
| Ankle/Foot X-Ray                 | 25.80  |
| Orthopantography                 | 32.44  |
| Wrist X-Ray                      | 18.75  |
| Opaque Enema X-Ray               | 143.41 |

|                                                                     |         |
|---------------------------------------------------------------------|---------|
| Intestinal transit radiography                                      | 218.59  |
| Bone densitometry                                                   | 73.72   |
| Urography                                                           | 211.84  |
| Cystography                                                         | 146.93  |
| <b>Ultrasound</b>                                                   |         |
| Thyroid ultrasound                                                  | 54.44   |
| Soft tissue ultrasound                                              | 63.33   |
| Cervical ultrasound                                                 | 58.99   |
| Doppler ultrasound of lower limbs                                   | 142.30  |
| Abdominal ultrasound                                                | 81.09   |
| Gynecological ultrasound                                            | 54.74   |
| Transthoracic Echocardiogram                                        | 105.03  |
| <b>Tomography (CT) and Nuclear Magnetic Resonance Imaging (NMR)</b> |         |
| Brain CT                                                            | 135.75  |
| Abdomen CT                                                          | 135.00  |
| Chest CT                                                            | 124.49  |
| Abdominal Thoracic CT                                               | 164.16  |
| TACAR (High Resolution CT)                                          | 59.05   |
| Cerebral angiography                                                | 1066.01 |
| Facial and neck CT                                                  | 145.75  |
| Abdomino-pelvic CT                                                  | 245.46  |
| Brain MRI                                                           | 265.18  |
| Cervical MRI                                                        | 280.47  |
| Whole MRI                                                           | 483.31  |
| Dorsal MRI                                                          | 255.88  |
| Lumbar MRI                                                          | 258.02  |
| MRI cholangio                                                       | 317.29  |
| MRI lumbar dorsal                                                   | 165.97  |
| MRI Sacroiliac MRI                                                  | 231.96  |
| Lumbosacral MRI                                                     | 128.00  |
| MRI of the hip                                                      | 214.51  |
| Cerebral arteriography                                              | 642.46  |
| Coronary angiography                                                | 359.63  |
| Thyroid scan                                                        | 43.25   |
| <b>Procedures and other tests</b>                                   |         |
| Colonoscopy with biopsy                                             | 267.13  |
| Gastroduodenoscopy                                                  | 338.47  |
| Rectoscopy                                                          | 86.09   |
| H pylori TEST                                                       | 72.11   |
| Gait test                                                           | 192.29  |
| Cystoscopy                                                          | 180.77  |

|                                          |        |
|------------------------------------------|--------|
| Manometry                                | 389.71 |
| Psychology                               | 70.35  |
| Capillaroscopy                           | 232.90 |
| Respiratory Physiotherapy                | 12.24  |
| Campimetry                               | 95.36  |
| <b>Hospital consultations by service</b> |        |
| Rheumatology                             | 112.47 |
| Digestive                                | 201.50 |
| Hematology                               | 110.15 |
| Dermatology                              | 74.31  |
| Neurology                                | 138.56 |
| Internal Medicine                        | 226.01 |
| Pneumology                               | 188.99 |
| Nephrology                               | 240.20 |
| Ophthalmology                            | 103.71 |
| Traumatology                             | 90.63  |
| Maxillofacial Surgery                    | 84.22  |
| Nutrition                                | 84.07  |
| General surgery                          | 133.17 |
| Allergy                                  | 116.45 |
| Neurosurgery                             | 151.55 |
| Cardiology                               | 84.62  |
| Endocrinology                            | 139.82 |
| Urology                                  | 97.80  |
| Medical Oncology                         | 137.26 |
| Radiation Oncology                       | 111.80 |
| Otorhinolaryngology                      | 52.96  |
| Thoracic surgery                         | 124.60 |
| Vascular surgery                         | 67.97  |
| Rehabilitation                           | 103.21 |
| Day hospital                             | 228.48 |
| Cures                                    | 38.68  |
| Nurse's office                           | 18.31  |
| Psychiatry                               | 92.43  |
| Anesthesia                               | 57.95  |
| Respiratory Physiotherapy                | 12.24  |
| Neurophysiology                          | 202.85 |
| Infectious                               | 162.76 |
| <b>Admissions (average cost per day)</b> |        |
| Emergency room                           | 104.52 |
| Urology                                  | 850.88 |

|                               |         |
|-------------------------------|---------|
| Nephrology                    | 862.69  |
| Rheumatology                  | 923.76  |
| Digestive                     | 557.74  |
| Intensive Care Unit           | 1752.37 |
| Hematology                    | 818.95  |
| General and digestive surgery | 808.15  |
| Ophthalmology                 | 1633.30 |
| Pneumology                    | 514.50  |
| Cardiology                    | 1024.12 |
| Internal Medicine             | 478.57  |
| Neurosurgery                  | 960.95  |
| Neurology                     | 622.87  |
| <b>Procedures</b>             |         |
| Pigtail placement             | 705.00  |
| Red blood cell concentrates   | 92.00   |
| Hemostasis study              | 7.69    |
| Keratoplasty                  | 476.50  |
| Fibrobronchoscopy             | 147.19  |
| Cholecystectomy surgery       | 2912.94 |
| Cryotherapy                   | 51.46   |
| Lumbar puncture               | 243.16  |
| Plaquetoaferesis              | 467.00  |
| Caudal block                  | 651.21  |
| Central venous catheter       | 625.79  |
| Operating room                | 558.68  |

Supplementary Table S2. Total healthcare cost per patient and breakdown by cost of tests, consultations, hospital admissions and cost of medication

| Patient ID | Total cost of tests (€) | Total cost of consultations (€) | Cost of hospital admission (€) | Cost of thiopurine treatment (€) | Cost of concomitant treatment (€) | Total healthcare cost (€) |
|------------|-------------------------|---------------------------------|--------------------------------|----------------------------------|-----------------------------------|---------------------------|
| 10         | 745.71                  | 1088.90                         | 5272.94                        | 36.08                            | 43.26                             | 7186.89                   |
| 20         | 395.41                  | 806.01                          |                                | 275.40                           |                                   | 1476.82                   |
| 30         | 520.32                  | 1012.23                         | 209.05                         | 36.08                            | 30.00                             | 1807.67                   |
| 40         | 321.76                  | 449.88                          |                                | 27.06                            | 7.50                              | 806.20                    |
| 50         | 766.08                  | 495.87                          | 19943.75                       | 45.10                            | 11.28                             | 21262.08                  |
| 70         | 864.46                  | 438.79                          | 9618.13                        | 27.06                            | 17.50                             | 10965.94                  |
| 90         | 134.46                  | 486.02                          |                                | 27.06                            | 262.35                            | 909.90                    |
| 100        | 1190.38                 | 1117.66                         | 6632.66                        | 36.08                            | 392.14                            | 9368.92                   |
| 120        | 748.38                  | 1082.49                         | 104.52                         | 99.22                            | 11.70                             | 2046.31                   |
| 130        | 807.92                  | 987.26                          | 10872.65                       | 18.04                            | 11.28                             | 12697.16                  |
| 140        | 374.79                  | 462.58                          |                                | 36.08                            | 15.04                             | 888.49                    |
| 150        | 259.08                  | 462.16                          |                                | 72.16                            | 46.83                             | 840.23                    |
| 160        | 259.08                  | 716.83                          |                                | 72.16                            |                                   | 1048.07                   |
| 170        | 329.18                  | 562.35                          |                                | 135.30                           | 23.04                             | 1049.87                   |
| 180        | 185.37                  | 371.53                          |                                | 135.30                           | 15.00                             | 707.20                    |
| 200        | 271.06                  | 674.82                          | 104.52                         | 72.16                            | 15.00                             | 1137.56                   |
| 230        | 469.74                  | 1007.51                         | 1219.99                        | 117.26                           | 15.00                             | 2829.51                   |
| 240        | 748.34                  | 1410.52                         | 104.52                         | 54.12                            | 392.14                            | 2709.64                   |
| 260        | 480.49                  | 1410.52                         | 104.52                         | 81.18                            | 4592.61                           | 6669.32                   |
| 270        | 185.37                  | 537.42                          |                                | 72.16                            | 20.00                             | 814.95                    |
| 290        | 195.84                  | 297.22                          |                                | 72.16                            | 15.00                             | 580.22                    |
| 300        | 159.92                  | 371.53                          |                                | 72.16                            | 15.00                             | 618.60                    |
| 310        | 620.29                  | 1696.09                         |                                | 99.22                            | 392.14                            | 2807.73                   |
| 320        | 671.88                  | 2732.01                         | 104.52                         | 81.18                            | 40.48                             | 3630.07                   |
| 330        | 156.67                  | 297.22                          |                                | 135.30                           | 15.00                             | 604.19                    |
| 340        | 2276.44                 | 1007.51                         | 16275.23                       | 99.22                            |                                   | 19658.41                  |
| 380        | 77.60                   | 74.31                           |                                | 9.02                             | 20.00                             | 180.93                    |
| 390        | 113.52                  | 148.61                          |                                | 90.20                            | 20.00                             | 372.34                    |
| 400        | 1393.82                 | 737.68                          | 11804.44                       | 54.12                            |                                   | 13990.06                  |
| 410        | 418.83                  | 1146.07                         | 1115.47                        | 135.30                           | 392.14                            | 3207.81                   |
| 420        | 626.37                  | 1007.51                         |                                | 117.26                           | 10.00                             | 1761.14                   |
| 430        | 231.76                  | 1081.82                         |                                | 99.22                            |                                   | 1412.80                   |
| 440        | 2016.57                 | 1325.47                         | 104.52                         | 18.04                            |                                   | 3464.60                   |
| 450        | 113.52                  | 1740.96                         | 4737.89                        | 99.22                            | 15.04                             | 6706.63                   |



|      |         |         |          |        |          |          |
|------|---------|---------|----------|--------|----------|----------|
| 460  | 939.59  | 412.79  | 313.57   | 18.04  | 67.56    | 1751.55  |
| 470  | 1091.83 | 2095.97 |          | 99.22  | 6765.42  | 10052.44 |
| 480  | 1668.84 | 411.72  | 104.52   | 63.14  | 25.00    | 2273.22  |
| 490  | 1579.98 | 1146.96 | 104.52   | 76.50  | 15.00    | 2922.97  |
| 500  | 1538.32 | 1117.66 | 6129.36  | 45.10  | 392.14   | 9222.58  |
| 510  | 323.00  | 1319.16 | 12184.97 | 76.50  | 11.70    | 13915.33 |
| 520  | 353.77  | 876.32  |          | 36.08  | 15.00    | 1281.17  |
| 530  | 159.92  | 779.39  |          | 36.08  | 15.00    | 990.39   |
| 540  | 195.84  | 1209.02 |          | 36.08  | 20.00    | 1460.93  |
| 580  | 347.97  | 1209.02 |          | 72.16  |          | 1629.14  |
| 590  | 366.42  | 498.73  | 104.52   | 72.16  | 15.00    | 1056.83  |
| 620  | 2377.39 | 806.01  | 571.52   | 99.22  | 30.00    | 3884.14  |
| 650  | 776.22  | 1321.49 | 104.52   | 168.30 |          | 2370.53  |
| 710  | 766.25  | 1972.87 | 8569.98  | 76.50  | 30.00    | 11415.60 |
| 720  | 447.42  | 1321.49 | 25329.41 | 81.18  |          | 27179.50 |
| 730  | 1069.16 | 1209.02 |          | 63.14  | 86.80    | 2428.12  |
| 740  | 591.09  | 1183.99 |          | 45.10  | 168.06   | 1988.24  |
| 770  | 246.64  | 939.18  | 1673.21  | 18.04  | 300.00   | 3177.07  |
| 780  | 235.30  | 2758.10 |          | 72.16  | 4592.61  | 7658.16  |
| 790  | 603.97  | 1612.02 | 209.05   | 99.22  | 11.70    | 2535.96  |
| 800  | 2693.17 | 411.91  | 571.52   | 72.16  | 15.00    | 3763.76  |
| 820  | 333.39  | 628.06  | 522.61   | 45.10  | 23.04    | 1552.20  |
| 830  | 272.01  | 1190.92 |          | 99.22  | 22.56    | 1584.71  |
| 860  | 589.89  | 892.79  | 27485.20 | 99.22  | 5.85     | 29072.95 |
| 870  | 773.59  | 734.08  | 104.52   | 54.12  | 16.94    | 1683.25  |
| 890  | 273.64  | 657.95  |          | 81.18  |          | 1012.77  |
| 900  | 425.27  | 1007.51 |          | 99.22  | 353.68   | 1885.69  |
| 910  | 1287.50 | 1209.02 |          | 81.18  | 6765.42  | 9343.12  |
| 920  | 134.46  | 1007.51 |          | 99.22  |          | 1241.20  |
| 940  | 123.99  | 222.92  |          | 54.12  | 170.82   | 571.85   |
| 950  | 123.99  | 1612.02 |          | 117.26 | 12528.84 | 14382.12 |
| 960  | 319.61  | 1119.98 |          | 81.18  | 10.12    | 1530.90  |
| 970  | 113.52  | 403.01  |          | 168.30 |          | 684.83   |
| 980  | 193.19  | 403.01  | 104.52   | 99.22  |          | 799.94   |
| 990  | 1264.20 | 806.01  |          | 45.10  | 15.00    | 2130.31  |
| 1000 | 845.26  | 403.01  |          | 117.26 | 265.26   | 1630.79  |
| 1010 | 185.26  | 487.23  |          | 117.26 |          | 789.75   |
| 1020 | 185.26  | 604.51  |          | 99.22  | 4592.61  | 5481.60  |
| 1050 | 194.28  | 604.51  |          | 153.34 | 392.14   | 1344.27  |
| 1060 | 134.46  | 870.85  |          | 117.26 |          | 1122.57  |
| 1080 | 134.46  | 604.51  |          | 117.26 | 34.71    | 890.94   |

|      |         |         |         |        |         |          |
|------|---------|---------|---------|--------|---------|----------|
| 1090 | 958.39  | 1072.35 |         | 81.18  | 170.82  | 2282.75  |
| 1100 | 278.05  | 604.51  |         | 135.30 | 11.70   | 1029.56  |
| 1110 | 562.21  | 403.01  |         | 117.26 | 265.26  | 1347.74  |
| 1130 | 1013.87 | 1209.02 |         | 168.30 |         | 2391.19  |
| 1140 | 603.11  | 514.80  |         | 72.16  | 16.94   | 1207.01  |
| 1150 | 481.28  | 816.35  | 104.52  | 99.22  | 392.14  | 1893.51  |
| 1160 | 445.35  | 1007.51 | 209.05  | 135.30 | 392.14  | 2189.35  |
| 1170 | 597.06  | 1410.52 |         | 135.30 | 11.70   | 2154.58  |
| 1180 | 491.14  | 1360.57 |         | 99.22  | 1.95    | 1952.88  |
| 1190 | 731.83  | 1995.33 | 4848.87 | 117.26 | 392.14  | 8085.43  |
| 1200 | 180.86  | 1760.70 |         | 81.18  | 15.00   | 2037.74  |
| 1210 | 609.25  | 1760.63 |         | 168.30 | 75.90   | 2614.08  |
| 1220 | 797.82  | 2230.64 | 5974.75 | 168.30 | 6765.42 | 15936.93 |
| 1230 | 180.86  | 604.51  |         | 117.26 | 16.94   | 919.56   |
| 1240 | 141.92  | 1342.19 |         | 117.26 |         | 1601.37  |
| 1250 | 134.46  | 1757.76 |         | 135.30 | 392.14  | 2419.67  |
| 1260 | 819.99  | 995.00  | 209.05  | 99.22  |         | 2123.26  |
| 1270 | 466.23  | 604.51  |         | 54.12  | 4592.61 | 5717.47  |
| 1280 | 419.84  | 737.68  |         | 135.30 |         | 1292.81  |
| 1300 | 1287.01 | 604.51  |         | 117.26 |         | 2008.78  |
| 1310 | 134.46  | 403.01  |         | 135.30 | 392.14  | 1064.91  |
| 1320 | 2047.28 | 403.01  | 5890.92 | 135.30 | 4592.61 | 13069.12 |
| 1330 | 227.25  | 780.99  |         | 135.30 | 69.44   | 1212.97  |
| 1340 | 161.32  | 1556.26 | 112.21  | 27.06  |         | 1856.85  |
| 1350 | 419.84  | 520.14  |         | 99.22  | 3.90    | 1043.10  |
| 1360 | 190.62  | 1981.03 | 4461.88 | 99.22  | 156.24  | 6888.99  |
| 1370 | 180.86  | 524.19  |         | 36.08  | 15.00   | 756.12   |
| 1380 | 273.64  | 785.76  |         | 99.22  | 392.14  | 1550.76  |
| 1390 | 631.23  | 1061.47 | 104.52  | 99.22  | 4592.61 | 6489.06  |
| 1400 | 215.85  | 1692.96 |         | 99.22  | 4592.61 | 6600.64  |
| 1410 | 416.40  | 934.95  | 418.09  | 117.26 | 84.03   | 1970.73  |
| 1420 | 185.26  | 1007.51 |         | 81.18  |         | 1273.96  |
| 1430 | 975.55  | 806.01  | 2335.46 | 45.10  | 69.44   | 4231.57  |
| 1440 | 1393.68 | 806.01  |         | 99.22  |         | 2298.91  |
| 1450 | 769.90  | 1848.14 |         | 81.18  | 69.44   | 2768.66  |
| 1460 | 1225.31 | 604.51  |         | 99.22  | 16.94   | 1945.98  |
| 1470 | 299.74  | 2134.19 |         | 117.26 |         | 2551.19  |
| 1480 | 205.69  | 2256.11 |         | 99.22  | 11.70   | 2572.73  |
| 1490 | 205.69  | 2525.95 |         | 99.22  | 4592.61 | 7423.47  |
| 1500 | 205.69  | 1146.07 |         | 99.22  | 392.14  | 1843.13  |
| 1510 | 205.69  | 604.51  |         | 117.26 | 392.14  | 1319.60  |

|      |         |         |          |        |         |          |
|------|---------|---------|----------|--------|---------|----------|
| 1520 | 159.30  | 806.01  |          | 81.18  |         | 1046.49  |
| 1530 | 230.53  | 1007.51 |          | 99.22  |         | 1337.26  |
| 1540 | 369.70  | 793.50  |          | 122.40 | 15.00   | 1300.60  |
| 1550 | 205.69  | 708.21  |          | 81.18  | 224.08  | 1219.17  |
| 1560 | 267.52  | 1007.51 |          | 275.40 |         | 1550.43  |
| 1580 | 159.30  | 554.24  |          | 72.16  | 8.70    | 794.40   |
| 1590 | 205.69  | 1037.78 |          | 72.16  | 16.94   | 1332.57  |
| 1600 | 442.29  | 448.93  |          | 72.16  | 11.34   | 974.71   |
| 1610 | 180.86  | 148.61  |          | 45.10  | 30.00   | 404.57   |
| 1620 | 180.86  | 716.98  |          | 168.30 | 15.00   | 1081.13  |
| 1640 | 1794.99 | 806.01  | 209.05   | 229.50 | 392.14  | 3431.68  |
| 1650 | 273.64  | 1140.68 |          | 117.26 |         | 1531.58  |
| 1660 | 522.63  | 604.51  |          | 99.22  | 224.08  | 1450.44  |
| 1670 | 227.25  | 604.51  |          | 168.30 | 75.90   | 1075.96  |
| 1680 | 400.66  | 720.78  | 13207.64 | 36.08  | 6.26    | 14371.41 |
| 1700 | 134.46  | 1007.51 |          | 81.18  | 16.94   | 1240.10  |
| 1710 | 1105.95 | 1054.39 | 104.52   | 72.16  | 6765.42 | 9102.44  |
| 1720 | 227.25  | 297.22  |          | 72.16  | 11.70   | 608.33   |
| 1730 | 812.15  | 872.90  |          | 81.18  | 11.70   | 1777.93  |
| 1740 | 546.26  | 371.53  |          | 135.30 | 11.70   | 1064.79  |
| 1750 | 227.25  | 1961.25 |          | 229.50 | 4592.61 | 7010.61  |
| 1760 | 204.66  | 806.01  | 104.52   | 135.30 |         | 1250.49  |
| 1770 | 280.39  | 604.51  |          | 135.30 | 6765.42 | 7785.62  |
| 1780 | 219.96  | 604.51  |          | 135.30 | 168.06  | 1127.83  |
| 1790 | 686.97  | 1007.51 |          | 81.18  |         | 1775.66  |
| 1820 | 2256.88 | 604.51  | 15912.97 | 117.26 |         | 18891.61 |
| 1830 | 281.40  | 1924.28 |          | 99.22  | 15.00   | 2319.90  |
| 1840 | 538.82  | 604.51  | 209.05   | 99.22  | 265.26  | 1716.85  |
| 1860 | 303.91  | 737.68  |          | 99.22  |         | 1140.81  |
| 1870 | 130.68  | 1335.15 | 3743.10  | 36.08  | 156.24  | 5401.25  |
| 1890 | 467.05  | 806.01  | 104.52   | 135.30 | 15.00   | 1527.88  |
| 1900 | 178.54  | 1767.52 |          | 72.16  | 30.00   | 2048.23  |
| 1910 | 180.86  | 972.43  |          | 99.22  | 11.70   | 1264.20  |
| 1920 | 422.10  | 224.94  |          | 54.12  | 11.70   | 712.86   |
| 1930 | 267.24  | 604.51  |          | 99.22  |         | 970.97   |
| 1950 | 333.75  | 222.92  |          | 72.16  | 5.85    | 634.67   |
| 1970 | 208.72  | 222.92  |          | 72.16  | 22.56   | 526.36   |
| 1990 | 178.54  | 787.29  |          | 36.08  | 22.56   | 1024.47  |
| 2000 | 264.60  | 904.04  |          | 72.16  | 11.70   | 1252.50  |
| 2010 | 152.01  | 1409.02 |          | 117.26 | 15.00   | 1693.29  |
| 2050 | 134.46  | 708.21  |          | 36.08  | 15.00   | 893.76   |

|      |         |         |         |        |         |          |
|------|---------|---------|---------|--------|---------|----------|
| 2080 | 855.66  | 222.92  | 3400.57 | 72.16  | 11.70   | 4563.01  |
| 2090 | 457.23  | 337.41  | 104.52  | 36.08  | 11.70   | 946.95   |
| 2100 | 401.35  | 500.04  |         | 99.22  | 23.76   | 1024.36  |
| 2120 | 198.40  | 148.61  |         | 36.08  | 7.50    | 390.59   |
| 2130 | 465.55  | 377.98  | 2162.52 | 45.10  | 15.00   | 3066.15  |
| 2160 | 88.07   | 972.04  |         | 162.36 | 15.00   | 1237.47  |
| 2180 | 385.55  | 789.89  |         | 27.06  | 30.00   | 1232.50  |
| 2190 | 398.61  | 222.92  |         | 99.22  | 15.00   | 735.75   |
| 2210 | 258.38  | 188.99  | 5145.00 | 27.06  | 22.56   | 5641.99  |
| 2220 | 508.36  | 112.47  | 209.05  | 27.06  | 15.00   | 871.94   |
| 2230 | 367.05  | 744.98  |         | 72.16  | 30.00   | 1214.19  |
| 2240 | 341.64  | 371.53  | 104.52  | 108.24 | 12.50   | 938.43   |
| 2280 | 239.49  | 831.36  |         | 54.12  | 22.56   | 1147.53  |
| 2290 | 749.73  | 1220.91 |         | 72.16  | 5.85    | 2048.65  |
| 2310 | 624.96  | 371.53  |         | 135.30 | 11.28   | 1143.07  |
| 2330 | 227.25  | 429.19  |         | 54.12  | 11.70   | 722.25   |
| 2340 | 358.76  | 188.99  | 104.52  | 9.02   | 15.00   | 676.29   |
| 2350 | 828.21  | 944.95  |         | 72.16  | 15.00   | 1860.32  |
| 2360 | 518.32  | 1018.99 |         | 72.16  | 15.00   | 1624.47  |
| 2370 | 930.53  | 566.97  | 209.05  | 72.16  | 2.56    | 1781.26  |
| 2400 | 976.08  | 623.75  | 1133.52 | 9.02   | 10.04   | 2752.41  |
| 2410 | 134.46  | 933.97  |         | 81.18  | 15.00   | 1164.62  |
| 2420 | 424.60  | 447.56  |         | 27.06  | 15.00   | 914.22   |
| 2450 | 112.31  | 1234.13 |         | 135.30 | 1817.74 | 3299.48  |
| 2460 | 259.62  | 1372.76 | 4263.19 | 18.04  | 15.00   | 5928.61  |
| 2490 | 227.25  | 207.30  |         | 9.02   | 11.70   | 455.27   |
| 2500 | 463.77  | 889.13  | 104.52  | 36.08  | 30.00   | 1523.50  |
| 2510 | 1957.36 | 112.47  | 2997.72 | 9.02   | 15.00   | 5091.57  |
| 2520 | 320.59  | 371.53  | 104.52  | 99.22  | 85.41   | 981.27   |
| 2530 | 706.04  | 387.85  |         | 36.08  | 30.00   | 1159.97  |
| 2540 | 299.82  | 462.60  | 209.05  | 9.02   | 30.00   | 1010.48  |
| 2570 | 1481.20 | 380.83  | 8037.08 | 9.02   | 11.28   | 9919.40  |
| 2580 | 541.81  | 602.92  |         | 72.16  | 22.56   | 1239.45  |
| 2600 | 301.90  | 1141.83 |         | 81.18  | 23.04   | 1547.96  |
| 2610 | 1054.11 | 186.78  | 1133.52 | 27.06  | 30.00   | 2431.47  |
| 2630 | 388.05  | 892.79  | 9605.61 | 27.06  | 11.70   | 10925.21 |
| 2660 | 367.47  | 495.23  | 104.52  | 99.22  | 34.51   | 1100.95  |
| 2670 | 96.51   | 598.97  |         | 99.22  | 23.04   | 817.74   |
| 2690 | 635.36  | 767.89  | 104.52  | 72.16  | 15.00   | 1594.93  |
| 2710 | 213.29  | 1374.50 |         | 72.16  | 11.70   | 1671.66  |
| 2720 | 1605.79 | 459.43  |         | 99.22  | 23.04   | 2187.48  |

|      |         |         |         |        |        |         |
|------|---------|---------|---------|--------|--------|---------|
| 2730 | 221.54  | 112.47  |         | 9.02   | 15.00  | 358.03  |
| 2740 | 346.30  | 1557.03 |         | 72.16  | 11.70  | 1987.19 |
| 2760 | 233.01  | 647.34  |         | 135.30 | 15.00  | 1030.65 |
| 2770 | 137.27  | 1298.62 | 102.92  | 36.08  | 11.70  | 1586.60 |
| 2780 | 134.46  | 566.97  |         | 36.08  | 30.00  | 767.51  |
| 2790 | 604.95  | 566.97  |         | 81.18  | 30.00  | 1283.10 |
| 2810 | 88.07   | 653.68  |         | 99.22  | 15.00  | 855.97  |
| 2820 | 336.68  | 337.41  |         | 9.02   | 23.04  | 706.15  |
| 2830 | 383.08  | 355.72  |         | 9.02   | 23.04  | 770.86  |
| 2840 | 675.42  | 1156.30 |         | 72.16  | 22.56  | 1926.44 |
| 2850 | 264.52  | 371.53  |         | 72.16  | 7.50   | 715.71  |
| 2860 | 307.46  | 224.94  |         | 27.06  | 15.00  | 574.46  |
| 2880 | 796.11  | 445.83  | 104.52  | 135.30 | 15.00  | 1496.77 |
| 2890 | 349.69  | 755.96  |         | 81.18  | 15.00  | 1201.83 |
| 2900 | 180.86  | 345.97  | 104.52  | 18.04  | 1.95   | 651.34  |
| 2910 | 408.60  | 603.59  | 209.05  | 72.16  | 15.00  | 1308.39 |
| 2940 | 497.78  | 1037.67 | 8192.92 | 72.16  | 30.00  | 9830.53 |
| 2950 | 290.87  | 1098.37 | 104.52  | 72.16  | 15.00  | 1580.92 |
| 2960 | 447.35  | 222.92  |         | 54.12  | 170.82 | 895.20  |
| 2970 | 437.15  | 675.20  |         | 72.16  |        | 1184.51 |
| 2980 | 41.68   | 337.41  |         | 18.04  | 15.00  | 412.13  |
| 2990 | 88.07   | 470.83  | 1029.00 | 9.02   | 15.00  | 1611.92 |
| 3000 | 695.85  | 447.56  |         | 81.18  | 11.70  | 1236.29 |
| 3010 | 329.47  | 148.61  | 104.52  | 72.16  | 5.85   | 660.61  |
| 3020 | 409.45  | 130.78  | 209.05  | 18.04  | 15.00  | 782.32  |
| 3030 | 312.70  | 789.74  |         | 99.22  | 28.44  | 1230.11 |
| 3040 | 573.00  | 1016.97 |         | 72.16  | 15.00  | 1677.13 |
| 3050 | 1191.84 | 371.53  |         | 72.16  | 15.00  | 1650.53 |
| 3060 | 88.07   | 239.24  |         | 18.04  | 5.85   | 351.20  |
| 3080 | 458.93  | 1497.23 |         | 99.22  | 11.28  | 2066.65 |
| 3090 | 695.14  | 1764.45 | 313.57  | 72.16  |        | 2845.31 |
| 3100 | 450.15  | 1256.61 |         | 135.30 | 7.50   | 1849.56 |
| 3120 | 88.07   | 130.78  |         | 9.02   | 23.04  | 250.91  |
| 3150 | 341.27  | 337.41  |         | 90.20  | 30.00  | 798.88  |
| 3190 | 351.93  | 1452.17 |         | 36.08  | 12.52  | 1852.70 |
| 3200 | 730.53  | 1059.84 |         | 72.16  | 3.90   | 1866.43 |
| 3210 | 512.24  | 252.32  |         | 9.02   | 85.41  | 858.98  |
| 3220 | 116.51  | 749.51  |         | 99.22  | 15.00  | 980.24  |
| 3230 | 480.24  | 337.41  | 1209.89 | 72.16  | 145.92 | 2245.61 |
| 3250 | 425.14  | 112.47  |         | 9.02   | 11.70  | 558.33  |
| 3260 | 569.83  | 1213.48 |         | 72.16  | 30.00  | 1885.47 |

|      |         |         |         |        |        |          |
|------|---------|---------|---------|--------|--------|----------|
| 3270 | 785.72  | 941.99  | 104.52  | 99.22  | 15.00  | 1946.45  |
| 3280 | 480.65  | 703.33  |         | 135.30 |        | 1319.28  |
| 3310 | 3458.51 | 7997.36 | 2807.97 | 72.16  | 15.00  | 14351.00 |
| 3320 | 1166.31 | 835.36  | 104.52  | 72.16  | 11.70  | 2190.05  |
| 3330 | 113.87  | 1455.07 |         | 81.18  | 15.00  | 1665.12  |
| 3340 | 299.82  | 1597.62 |         | 99.22  | 15.00  | 2011.65  |
| 3350 | 189.30  | 1068.73 | 243.16  | 27.06  | 15.00  | 1543.25  |
| 3380 | 134.46  | 148.61  | 3349.99 | 18.04  | 10.00  | 3661.11  |
| 3410 | 488.06  | 138.56  | 418.09  | 9.02   | 30.00  | 1083.73  |
| 3420 | 206.31  | 602.14  |         | 99.22  | 18.80  | 926.47   |
| 3430 | 168.28  | 307.54  |         | 99.22  | 2.50   | 577.54   |
| 3440 | 88.07   | 465.66  |         | 81.18  | 2.50   | 637.41   |
| 3460 | 501.81  | 902.43  | 104.52  | 72.16  | 15.00  | 1595.91  |
| 3470 | 365.35  | 243.25  |         | 27.06  | 15.00  | 650.66   |
| 3480 | 603.83  | 207.30  |         | 9.02   | 30.00  | 850.15   |
| 3490 | 615.13  | 188.99  |         | 18.04  | 15.00  | 837.16   |
| 3500 | 308.34  | 461.98  | 9301.88 | 18.04  | 15.04  | 10105.27 |
| 3510 | 605.99  | 1000.27 | 209.05  | 99.22  | 156.24 | 2070.76  |

**(a)**

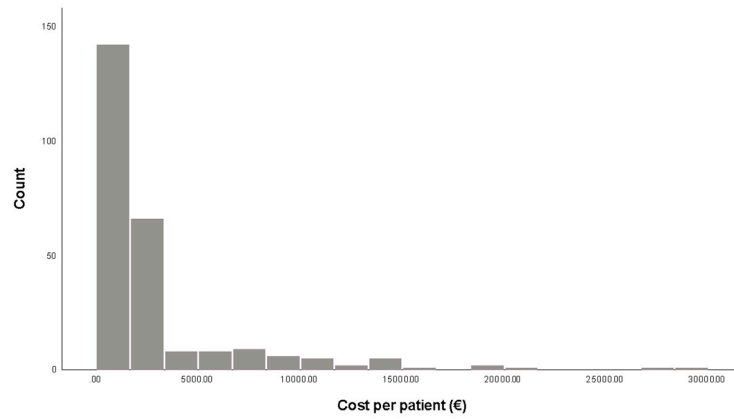

**(b)**

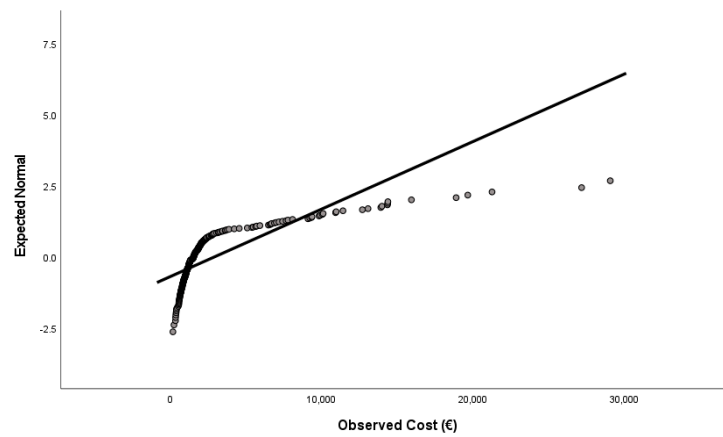

Supplementary Figure S1. Normality plots for the “Cost per patient (€)” variable. (a) Histogram showing the asymmetrical, leptokurtic distribution of the variable, (b) Quantile-quantile plot of the observed “Cost per patient (€)” value and the expected normal value.
